# Supplementary material for: Description and Genome Characterization of Three Novel Fungal Strains Isolated from Mars 2020 Mission-Associated Spacecraft Assembly Facility Surfaces—Recommendations for Two New Genera and One Species
Source: MDPI journal article supplement (doi:10.3390/jof9010031), 2022-12-23
Supplement: s1 [file s1]

**Supplemental Table S1:** Marker gene table for *Aaosphaeria pasadenensis* FJI-L9-BK-P1; N/A- not available

| Genus                        | Species                  | Strain          | LSU       | ITS       | TEF 1    | RPB 2    |
|------------------------------|--------------------------|-----------------|-----------|-----------|----------|----------|
| <i>Arthopyrenia</i>          | <i>sp.</i>               | UTHSC DI16-362  | LN907505  | LT796905  | LT797145 | LT797065 |
| <i>Arthopyrenia</i>          | <i>sp.</i>               | UTHSC DI16-334  | LN907477  | LT796887  | LT797127 | LT797047 |
| <i>Neoroussoella</i>         | <i>alishanense</i>       | FU31016         | MK503822  | MK503816  | MK336181 | MN037756 |
| <i>Neoroussoella</i>         | <i>bambusae</i>          | MFLUCC 11-0124  | KJ474839  | KJ474827  | KJ474848 | KJ474856 |
| <i>Neoroussoella</i>         | <i>sp.</i>               | MFLUCC 15-0098A | MH260309  | MH275075  | N/A      | N/A      |
| <i>Neoroussoella</i>         | <i>heveae</i>            | MFLUCC 17-1983  | MH590689  | MH590693  | N/A      | N/A      |
| <i>Neoroussoella</i>         | <i>lenispora</i>         | GZCC 16-0020    | KX791431  | N/A       | N/A      | N/A      |
| <i>Neoroussoella</i>         | <i>leucaenae</i>         | C356            | MK347984  | MK347767  | MK360067 | MK434876 |
| <i>Neoroussoella</i>         | <i>solani</i>            | CPC 26331       | KX228312  | KX228261  | N/A      | N/A      |
| <i>Roussoella</i>            | <i>mukdahanensis</i>     | HKAS 101766     | MH453485  | MH453489  | MH453478 | MH453482 |
| <i>Pararoussoella</i>        | <i>rosarum</i>           | MFLUCC 17-0796  | MG829048  | MG828939  | MG829224 | N/A      |
| <i>Parathyridaria</i>        | <i>ramulicola</i>        | CBS 141479      | KX650565  | KX650565  | KX650536 | KX650584 |
| <i>Parathyridaria</i>        | <i>robiniae</i>          | MFLUCC 14-1119  | KY511141  | KY511142  | KY549682 | N/A      |
| <i>Roussoella</i>            | <i>euonymi</i>           | CBS 143426      | MH107961  | MH107915  | N/A      | MH108007 |
| <i>Pseudoneoconiothyrium</i> | <i>rosae</i>             | MFLU 18-0117    | NG_059868 | NR_157523 | N/A      | N/A      |
| <i>Pseudoroussoella</i>      | <i>chromolaenae</i>      | MFLUCC 17-1492  | MT214439  | MT214345  | MT235769 | N/A      |
| <i>Pseudoroussoella</i>      | <i>elaicola</i>          | MFLUCC 17-1483  | MT214442  | MT214348  | MT235772 | MT235808 |
| <i>Pseudoroussoella</i>      | <i>elaicola</i>          | MFLUCC 15-0276b | MH742327  | MH742330  | N/A      | N/A      |
| <i>Pseudoroussoella</i>      | <i>elaicola</i>          | MFLUCC 15-0276a | MH742326  | MH742329  | N/A      | N/A      |
| <i>Roussoella</i>            | <i>angusta</i>           | MFLUCC 15-0186  | KT281979  | N/A       | N/A      | N/A      |
| <i>Roussoella</i>            | <i>arundinacea</i>       | CPC 35554       | MT223928  | MT223838  | N/A      | N/A      |
| <i>Roussoella</i>            | <i>chiangraina</i>       | MFLUCC 10-0556  | KJ474840  | KJ474828  | KJ474849 | KJ474857 |
| <i>Roussoella</i>            | <i>doimaesalongensis</i> | MFLUCC 14-0584  | KY000659  | KY026584  | KY651249 | KY678394 |
| <i>Roussoella</i>            | <i>guttulata</i>         | MFLUCC 20-0102  | MT734818  | MT734821  | MW022188 | MW022187 |
| <i>Roussoella</i>            | <i>hysterioides</i>      | CBS 546.94      | KF443381  | KF443405  | KF443399 | KF443392 |
| <i>Roussoella</i>            | <i>intermedia</i>        | NBRC 106245     | AB524624  | KJ474831  | N/A      | N/A      |
| <i>Roussoella</i>            | <i>japanensis</i>        | MAFF 239636     | AB524621  | KJ474829  | AB539114 | AB539101 |
| <i>Roussoella</i>            | <i>kunmingensis</i>      | HKAS 101773     | MH453487  | MH453491  | MH453480 | MH453484 |
| <i>Roussoella</i>            | <i>magnatum</i>          | MFLUCC 15-0185  | KT281980  | N/A       | N/A      | N/A      |
| <i>Roussoella</i>            | <i>margidorensis</i>     | MUT 5329        | MN556322  | KU314944  | MN605897 | MN605917 |
| <i>Roussoella</i>            | <i>mediterranea</i>      | MUT 5369        | MN556324  | KU314947  | MN605899 | MN605919 |
| <i>Roussoella</i>            | <i>neopustulans</i>      | MFLUCC 11-0609  | KJ474841  | KJ474833  | KJ474850 | N/A      |
| <i>Roussoella</i>            | <i>neopustulans</i>      | MFLUCC 12-0003  | KU863119  | KU940130  | N/A      | N/A      |

|                         |                           |                  |          |           |          |          |
|-------------------------|---------------------------|------------------|----------|-----------|----------|----------|
| <i>Roussoella</i>       | <i>nitidula</i>           | MFLUCC 11–0182   | KJ474843 | KJ474835  | KJ474852 | KJ474859 |
| <i>Roussoella</i>       | <i>nitidula</i>           | MFLUCC 11–0634   | KJ474842 | KJ474834  | KJ474851 | KJ474858 |
| <i>Roussoella</i>       | <i>padinae</i>            | MUT 5365         | MN556327 | KU158170  | MN605902 | MN605922 |
| <i>Roussoella</i>       | <i>padinae</i>            | MUT5341          | MN556325 | KU158153  | MN605900 | MN605920 |
| <i>Roussoella</i>       | <i>pseudohysterioides</i> | MFLUCC 13–0852   | KU863120 | KU940131  | KU940198 | N/A      |
| <i>Roussoella</i>       | <i>pseudohysterioides</i> | HKAS 101758      | MH453486 | MH453490  | MH453479 | MH453483 |
| <i>Roussoella</i>       | <i>pustulans</i>          | MAFF 239637      | AB524623 | KJ474830  | AB539116 | AB539103 |
| <i>Roussoella</i>       | <i>scabrispora</i>        | MFLUCC 11–0624   | KJ474844 | KJ474836  | KJ474853 | KJ474860 |
| <i>Roussoella</i>       | <i>scabrispora</i>        | MFLUCC 14–0582   | KY000660 | KY026583  | N/A      | N/A      |
| <i>Roussoella</i>       | <i>scabrispora</i>        | RSC              | KX650566 | KX650566  | KX650537 | N/A      |
| <i>Roussoella</i>       | <i>siamensis</i>          | MFLUCC 11–0149   | KJ474845 | KJ474837  | KJ474854 | KJ474861 |
| <i>Roussoella</i>       | <i>thailandica</i>        | MFLUCC 11–0621   | KJ474846 | KJ474838  | N/A      | N/A      |
| <i>Roussoella</i>       | <i>tuberculata</i>        | MFLUCC 13–0854   | KU863121 | KU940132  | KU940199 | N/A      |
| <i>Roussoella</i>       | <i>verrucispora</i>       | CBS 125434       | AB524622 | KJ474832  | AB539115 | AB539102 |
| <i>Roussoella</i>       | <i>sp.</i>                | HKAS-101762-HKAS | MH453488 | MH453492  | MH453481 | N/A      |
| <i>Roussoellopsis</i>   | <i>macrospora</i>         | MFLUCC 12–0005   | KJ474847 | N/A       | KJ474855 | KJ474862 |
| <i>Roussoellopsis</i>   | <i>sp.</i>                | KT 1710          | AB524626 | N/A       | N/A      | N/A      |
| <i>Roussoellopsis</i>   | <i>tosaensis</i>          | KT 1659          | AB524625 | N/A       | AB539117 | AB539104 |
| <i>Setoarthopyrenia</i> | <i>chromolaenae</i>       | MFLUCC 17–1444   | MT214438 | MT214344  | MT235768 | MT235805 |
| <i>Roussoella</i>       | <i>acaciae</i>            | CBS 138873       | KP004497 | KP004469  | N/A      | N/A      |
| <i>Thyridaria</i>       | <i>broussonetiae</i>      | CBS 141481       | KX650568 | NR_147658 | KX650539 | KX650586 |
| <i>Torula</i>           | <i>herbarum</i>           | CBS 111855       | KF443386 | KF443409  | KF443403 | KF443396 |
| <i>Torula</i>           | <i>hollandica</i>         | CBS 220.69       | KF443384 | KF443406  | KF443401 | KF443393 |
| <i>Xenorousoella</i>    | <i>triseptata</i>         | MFLUCC 17–1438   | MT214437 | MT214343  | MT235767 | MT235804 |
| <i>Ohleria</i>          | <i>modesta</i>            | MGC              | KX650562 | KX650562  | KX650533 | KX650582 |
| <i>Ohleria</i>          | <i>modesta</i>            | CBS 141480       | KX650563 | KX650563  | KX650534 | KX650583 |
| <i>Dendryphion</i>      | <i>europaeum</i>          | CPC 22943        | KJ869203 | KJ869146  | N/A      | N/A      |
| <i>Nigrograna</i>       | <i>fuscidula</i>          | CBS 141476       | KX650547 | KX650547  | KX650522 | KX650576 |
| <i>Nigrograna</i>       | <i>mackinnonii</i>        | CBS 110022       | GQ387614 | KF015653  | KF407985 | KF015704 |
| <i>Nigrograna</i>       | <i>mycophila</i>          | CBS 141478       | KX650553 | KX650553  | KX650526 | N/A      |
| <i>Nigrograna</i>       | <i>norvegica</i>          | CBS 141485       | KX650556 | KX650556  | N/A      | KX650578 |
| <i>Nigrograna</i>       | <i>obliqua</i>            | CBS 141475       | KX650558 | KX650558  | KX650530 | KX650579 |
| <i>Arthopyrenia</i>     | <i>salicis</i>            | CBS 368.94       | AY538339 | KF443410  | KF443404 | KF443397 |
| <i>Arthopyrenia</i>     | <i>salicis</i>            | NRRL62788        | N/A      | KM030296  | N/A      | N/A      |
| <i>Roussoella</i>       | <i>intermedia</i>         | CBS 170.96       | KF443382 | KF443407  | KF443398 | KF443394 |

|                     |                |                |          |           |          |          |
|---------------------|----------------|----------------|----------|-----------|----------|----------|
| <i>Aaosphaeria</i>  | <i>arxii</i>   | CBS 175.79     | OU989224 | NR_169685 | N/A      | N/A      |
| <i>Arthopyrenia</i> | <i>salicis</i> | UTHSC:DI16-356 | LN907499 | LT796900  | LT797140 | LT797060 |
| <i>Arthopyrenia</i> | <i>salicis</i> | UTHSCDI16_220  | LN907363 | LT796841  | LT797081 | LT797001 |
