# Supplementary material for: Description and Genome Characterization of Three Novel Fungal Strains Isolated from Mars 2020 Mission-Associated Spacecraft Assembly Facility Surfaces—Recommendations for Two New Genera and One Species
Source: MDPI journal article supplement (doi:10.3390/jof9010031), 2022-12-23
Supplement: s1 [file s1]

**Supplemental Table S2:** Marker gene table for *Pasadenomyces melaninifex* FJII-L3-CM-DR1; N/A- not available

| Species name                          | Strain             | ITS         | LSU         | TEF 1      | RPB 1      | TUB        |
|---------------------------------------|--------------------|-------------|-------------|------------|------------|------------|
| <i>Anthracinomyces petraeus</i>       | CGMCC 3.17315      | KP174843.1  | KP174924.1  | KP174998.1 |            | KP226555.1 |
| <i>Anthracinomyces ramosus</i>        | CGMCC 3.16367      | KP174846.1  | KP174922.1  | KP175001.1 | KP226535.1 | KP226556.1 |
| <i>Knufia perforans</i>               | CBS 885.95 (T)     | MH862564.1  | NG042586.1  | N/A        | N/A        | N/A        |
| <i>Knufia petricola</i>               | CBS 726.95 (T)     | MH862556.1  | NG042775.1  | N/A        | N/A        | N/A        |
| <i>Knufia vaticanii</i>               | CCFEE 5939 (T)     | KP791780.1  | KR781068.1  | N/A        | N/A        | N/A        |
| <i>Knufia marmoricola</i>             | CCFEE 6201         | KP791790.1  | KR781077.1  | N/A        | N/A        | N/A        |
| <i>Knufia karalitana</i>              | CCFEE 5921         | KP791784.1  | KR781072.1  | N/A        | N/A        | N/A        |
| <i>Knufia epidermidis</i>             | CBS 120353 (T)     | NR_111330.1 | NG042475.1  | EU884530.1 | N/A        | N/A        |
| <i>Knufia cryptophialidica</i>        | DAOM 216555 (T)    | JN040501.1  | JN040500.1  | N/A        | N/A        | N/A        |
| <i>Knufia mediterranea</i>            | CBS 139721 (T)     | KP791794.1  | KR781081.1  | N/A        | N/A        | N/A        |
| <i>Arthrocladium tropicale</i>        | CBS 134926 (T)     | KX822543.1  | NG057119.1  | KT806378.1 | KX822573.1 | KX822406.1 |
| <i>Arthrocladium tardum</i>           | CBS 127021 (T)     | KT337440.1  | NG057089.1  | KT806376.1 | N/A        | N/A        |
| <i>Arthrocladium caudatum</i>         | CBS 457.67 (T)     | MH859032.1  | NG_057084   | KT806374.1 | LT558711.1 | LT558710.1 |
| <i>Arthrocladium fulminans</i>        | CBS 136243 (T)     | KT337439.1  | NG_057084   | KT806375.1 | N/A        | N/A        |
| <i>Chaetothyriales sp.</i>            | CBS 128958         | KX822541    | KX822541    | KX822464.1 | N/A        | N/A        |
| <i>Chaetothyriales sp.</i>            | CBS 129049         | KX822531    | KX822531    | KX822458.1 | N/A        | N/A        |
| <i>Chaetothyriales sp.</i>            | CBS 129047         | KX822533.1  | KX822533    | N/A        | N/A        | N/A        |
| <i>Exophiala placitae</i>             | CBS 121716 (T)     | MH863143.1  | MH874694.1  | N/A        | N/A        | N/A        |
| <i>Cladophialophora eucalypti</i>     | CBS 145551 (T)     | MK876380.1  | MK876419.1  | N/A        | N/A        | N/A        |
| <i>Cladophialophora pucciniophila</i> | KUS F23645         | JF263533.1  | JF263534.1  | N/A        | N/A        | N/A        |
| <i>Cladophialophora proteae</i>       | CBS 111667 (T)     | EU035411.1  | EU035411.1  | N/A        | KJ636044.1 | N/A        |
| <i>Strelitziana albiziae</i>          | CBS 126497 (T)     | MH864122.1  | HQ599585.1  | N/A        | N/A        | N/A        |
| <i>Strelitziana eucalypti</i>         | CBS 128214         | HQ599596.1  | HQ599597.1  | N/A        | N/A        | N/A        |
| <i>Strelitziana australiensis</i>     | CBS 124778 (T)     | GQ303295.1  | GQ303326.2  | GU384362.1 | N/A        | N/A        |
| <i>Strelitziana cliviae</i>           | CPC 19822 (T)      | KC005772.1  | NG042750.1  | N/A        | N/A        | N/A        |
| <i>Bradomyces alpinus</i>             | CCFEE 5493 (T)     | HG793052.1  | GU250396.1  | N/A        | LT558712.1 | LN589970.1 |
| <i>Bradomyces graniticola</i>         | F6A                | KX179910.1  | KX179912.1  | N/A        | N/A        | N/A        |
| <i>Bradomyces oncorhynchi</i>         | CCF 4369 (T)       | NR_132843.1 | NG058643.1  | HG426061.1 | LT558713.1 | HG426060.1 |
| <i>Trichomerium foliicola</i>         | MFLUCC 10-0078 (T) | JX313655.1  | JX313661.1  | N/A        | N/A        | N/A        |
| <i>Trichomerium gloeosporum</i>       | MFLUCC 10-0087 (T) | JX313656.1  | JX313662.1  | N/A        | N/A        | N/A        |
| <i>Trichomerium dioscoreae</i>        | CBS 138870 (T)     | NR_137946.1 | NG058126.1  | N/A        | N/A        | N/A        |
| <i>Trichomerium deniquelatum</i>      | MFLUCC 10-0884 (T) | JX313654.1  | JX313660.1  | N/A        | N/A        | N/A        |
| <i>Trichomerium eucalypti</i>         | CBS 143443 (T)     | NR_156672.1 | NG058525.1  | N/A        | N/A        | N/A        |
| <i>Knufia peltigerae</i>              | CGMCC:3.17283      | KP174864.1  | KP174935.1  | KP175006.1 | KP226513.1 | KP226562.1 |
| <i>Knufia tsunedae</i>                | FMR 10621 (T)      | NR_132842.1 | HG003672.1  | N/A        | N/A        | N/A        |
| <i>Metulocladosporiella musicola</i>  | CBS 110960 (T)     | MH862870.1  | DQ008153.1  | MG934484.1 | N/A        | N/A        |
| <i>Brycekendrickomyces acaciae</i>    | CBS 124104 (T)     | NR_132828.1 | NG_058633.1 | N/A        | N/A        | N/A        |
| <i>Exophiala encephalarti</i>         | CBS 128210         | HQ599588.1  | HQ599589.1  | N/A        | N/A        | N/A        |
| <i>Ceratomyrium melastoma</i>         | CPC 19837 (T)      | NR_111822.1 | NG_042749.1 | N/A        | N/A        | N/A        |
| <i>Neostrelitziana acaciigena</i>     | CBS 139903(T)      | NR_137987.1 | NG_058165.1 | N/A        | N/A        | N/A        |
| <i>Strelitziana africana</i>          | CBS 120037         | DQ885895.1  | DQ885895.1  | N/A        | N/A        | N/A        |
| <i>Lithohypha aloicola</i>            | CPC 35996(T)       | NR_166313.1 | MN567611.1  | MN556829.1 | N/A        | MN556837.1 |
| <i>Bacillicladium clematidis</i>      | CBS:145035         | NR_163355.1 | MK442512.1  |            | N/A        | MK442726.1 |
| <i>Lithohypha catenulata</i>          | CGMCC:3.14008      | KP174841.1  | KP174841.1  | KP174996.1 | KP226519.1 | KP226543.1 |
| <i>Lithohypha guttulata</i>           | CCFEE 5907         | KP791773.1  | KR781061.1  | N/A        | N/A        | N/A        |
| <i>Knufia calcarecola</i>             | CGMCC:3.17218      | N/A         | NG_074883.1 | KP175008.1 | KP226506.1 | N/A        |
| <i>Knufia separata</i>                | CGMCC 3.17337      | KP174856.1  | KP174932.1  | KP175003.1 | KP226516.1 | KP226564.1 |
| <i>Knufia walvisbayicola</i>          | CBS 146989         | NR_173046.1 | NG_076737.1 | N/A        | N/A        | N/A        |
| <i>Strelitziana malaysiana</i>        | CBS:139902         | NR_137988.1 | NG_058166.1 | N/A        | N/A        | N/A        |
| <i>Strelitziana cliviae</i>           | CPC 19822          | NR_111823   | NG_042750.1 | N/A        | N/A        | N/A        |
| <i>Strelitziana sarbhoyi</i>          | NFCCI 4772         | NR_172975.1 | NG_076696.1 | N/A        | N/A        | N/A        |
| <i>Strelitziana syzygii</i>           | CPC 26591          | NR_145400.1 | NG_059619.1 | KT950881.1 | N/A        | KT950884.1 |
| <i>Metulocladosporiella musae</i>     | CBS 161.74         | AY186199.1  | DQ008161.1  | MG934478.1 | N/A        | N/A        |
| <i>Trichomerium bambusae</i>          | MFLU 16-2286       | NR_155921.1 | N/A         | N/A        | N/A        | N/A        |
| <i>Trichomerium camporesii</i>        | MFLU 19-2251       | NR_169997.1 | MN644511.1  | N/A        | N/A        | N/A        |
| <i>Knufia sp. FH-2012</i>             | BJ01A29            | KF589944.1  | KF589944.1  | N/A        | N/A        | N/A        |
| <i>Knufia perfecta</i>                | IRAN 2553C         | MF062036.1  | MF062037.1  | N/A        | N/A        | N/A        |
| <i>Knufia hypolithi</i>               | CBS 146991         | NR_173045.1 | NG_076736.1 | N/A        | N/A        | N/A        |
| <i>Knufia endospora</i>               | UAMH 10396         | NR_111634.1 | JN040510.1  | N/A        | N/A        | N/A        |
| <i>Trichomerium cicatricatum</i>      | CGMCC 3.17307      | N/A         | N/A         | KP175025.1 | KP226531.1 | KP226540.1 |
| <i>Trichomerium flexuosum</i>         | CGMCC 3.17988      | NR_172253.1 | NG_075211.1 |            | KX348490.1 | KX348496.1 |
| <i>Trichomerium lapideum</i>          | CGMCC 3.17311      | NR_172231.1 | KP174850.1  | KP175023.1 | KP226528.1 | KP226539.1 |

|                                 |               |             |             |            |            |            |
|---------------------------------|---------------|-------------|-------------|------------|------------|------------|
| <i>Trichomerium leigongense</i> | CGMCC 3.17983 | NR_172254.1 | KX348470.1  | KX348493.1 | KX348491.1 | KX348497.1 |
| <i>Trichomerium syzygii</i>     | CPC 37184     | NR_170066.1 | NG_074428.1 | N/A        | N/A        | N/A        |
| <i>Fonsecaea pedrosoi</i>       | CBS 271.37    | Extracted   | Extracted   | Extracted  | Extracted  | Extracted  |
| <i>Incumbomyces lentus</i>      | CBS 128958    | NR_176739.1 | MT757423.1  | KX822464.1 | N/A        | N/A        |
| <i>Incumbomyces delicatus</i>   | CBS 129047    | NR_176738.1 | MT757422.1  | N/A        | N/A        | N/A        |
