# Supplementary material for: Description and Genome Characterization of Three Novel Fungal Strains Isolated from Mars 2020 Mission-Associated Spacecraft Assembly Facility Surfaces—Recommendations for Two New Genera and One Species
Source: MDPI journal article supplement (doi:10.3390/jof9010031), 2022-12-23
Supplement: s1 [file s1]

**Supplemental Table S3:** Marker Gene table for *Floridaphiala radiotolerans* FKI-L1-BK-DR1; N/A- not available

| Genus                      | Species              | Strain       | LSU       | ITS       | TEF1       | RPB2     | TUB      |
|----------------------------|----------------------|--------------|-----------|-----------|------------|----------|----------|
| <i>Elasticomyces</i>       | <i>elasticus</i>     | CCFEE 5490   | KF309992  | KF309951  | N/ A       | KF310047 | KF546746 |
| <i>Friedmanniomyces</i>    | <i>endolithicus</i>  | CCFEE 524    | GU250364  | JN88554   | N/ A       | KF310054 | KF546732 |
| <i>Recurvomyces</i>        | <i>mirabilis</i>     | CCFEE 5475   | KC315876  | KF309962  | N/ A       | KF310060 | N/ A     |
| <i>Mycosphaerella</i>      | <i>fijiensis</i>     | AFTOL 2021   | DQ678098  | N/ A      | N/ A       | DQ677993 | N/ A     |
| <i>Capnodium</i>           | <i>salicinum</i>     | CBS 131.34   | MH866941  | MH855469  | DQ677889   | KT216553 | N/ A     |
| <i>Capnodium</i>           | <i>coffaeae</i>      | CBS 147.52   | MH868489  | MH856967  | DQ471089   | KF902196 | N/ A     |
| <i>Phaeotheca</i>          | <i>fissurella</i>    | CBS 520.89   | MH873872  | MH862184  | MN829428   | MN829342 | N/ A     |
| <i>Stylodothis</i>         | <i>puccinioides</i>  | CBS 193.58   | MH869286  | MH857753  | DQ677886   |          | N/ A     |
| <i>Dothidea</i>            | <i>insculpta</i>     | CBS 189.58   | MH869284  | AF027764  | DQ471081   | DQ247792 | N/ A     |
| <i>Sydowia</i>             | <i>polyspora</i>     | CBS 116.29   | MH866487  | MH855019  | DQ677899   | GU357791 | N/ A     |
| <i>Elsinoe</i>             | <i>centrolobi</i>    | CBS 222.50   | NG_069000 | MH856595  | DQ677934   | KX887089 | N/ A     |
| <i>Myriangium</i>          | <i>duriae</i>        | CBS 260.36   | OM238138  | MH855793  | DQ677900   | KT216528 | N/ A     |
| <i>Saxomyces</i>           | <i>alpinus</i>       | CCFEE 5466   | GU250392  | N/ A      | N/ A       | N/ A     | N/ A     |
| <i>Saxomyces</i>           | <i>penninicus</i>    | CCFEE 5495   | KC315875  | N/ A      | N/ A       | N/ A     | N/ A     |
| <i>Lichenothelia</i>       | <i>convexa</i>       | LMCC0061     | KR045750  | Mycocosm  | Mycocosm   | N/ A     | Mycocosm |
| <i>Lichenothelia</i>       | <i>calcareae</i>     | L1324        | KC015062  | N/ A      | N/ A       | N/ A     | N/ A     |
| <i>Laurera</i>             | <i>megasperma</i>    | AFTOL 2094   | FJ267702  | N/ A      | N/ A       |          | N/ A     |
| <i>Trypethelium</i>        | <i>nitidiusculum</i> | AFTOL 2099   | FJ267701  | N/ A      | GU327732   | GU561856 | N/ A     |
| <i>Astrothelium</i>        | <i>cinnamomeum</i>   | DUKE 0000007 | AY584652  | AY584652  | DQ782896   | AY584690 | N/ A     |
| <i>Verruconis</i>          | <i>gallopava</i>     | CBS 437.64   | NG_058016 | HQ667553  | KF155968   | AB569127 | KF156203 |
| <i>Kirschsteiniothelia</i> | <i>aethiops</i>      | CBS 109.53   | MH869065  | MH857990  | DQ471084   | DQ470914 |          |
| <i>Leptosphaeria</i>       | <i>maculans</i>      | CBS 275.63   | MH869888  | MH858282  | MW735661   | KT389669 | KT389841 |
| <i>Pleospora</i>           | <i>herbarum</i>      | CBS 191.86   | JX681120  | MH861935  | KC584731   | KC584471 | AY749032 |
| <i>Westerdykella</i>       | <i>cylindrical</i>   | CBS 454.72   | NG_027595 | N/ A      | N/ A       | N/ A     | N/ A     |
| <i>Hysterobrevium</i>      | <i>smilacis</i>      | CBS 114601   | FJ161174  | N/ A      | FJ161091   | GU357806 | N/ A     |
| <i>Gloniopsis</i>          | <i>praelonga</i>     | CBS 112415   | FJ161173  | N/ A      | FJ161090   | FJ161113 | N/ A     |
| <i>Anisomeridium</i>       | <i>polypori</i>      | AFTOL 101    | DQ782906  | DQ782838  | DQ782894   | DQ782864 | N/ A     |
| <i>Lophium</i>             | <i>mytilinum</i>     | CBS 269.34   | DQ678081  | EF596817  | DQ677926   | GU456342 | Mycocosm |
| <i>Mytilinidion</i>        | <i>resinicola</i>    | CBS 304.34   | MH867038  | MH855535  | FJ161101   | FJ161120 | N/ A     |
| <i>Diplodia</i>            | <i>corticola</i>     | CBS 112549   | KF766323  | KF766156  | KF766398   | KX46395  | DQ458853 |
| <i>Neofusicoccum</i>       | <i>ribis</i>         | CBS 115475   | DQ678053  | KF766205  | DQ677893   | GU357789 |          |
| <i>Dothiorella</i>         | <i>ulmicola</i>      | CPC 24416    | KR611899  | KR611881  | KR611910   | N/ A     | KR611909 |
| <i>Botryosphaeria</i>      | <i>dothidea</i>      | CBS 115476   | NG_027577 | KF766151  | DQ767637   | GU357802 | N/ A     |
| <i>Abrothallus</i>         | <i>cladoniae</i>     | AB53         | KF816228  | KF816173  | KF816181   | KF816200 | N/ A     |
| <i>Abrothallus</i>         | <i>parmotrematis</i> | AB1          | KF816231  | KF816176  | KF816185.1 | KF816204 |          |
| <i>Kellermania</i>         | <i>confusa</i>       | CBS 131723   | KF766344  | NR_165953 | KF766405   | N/ A     | KF766134 |
| <i>Macrophomina</i>        | <i>phaseolina</i>    | CBS 227.33   | DQ377906  | KF951627  | KF952000   | N/ A     | KF531806 |
| <i>Saccharata</i>          | <i>capensis</i>      | CBS 122693   | N/ A      | KF766224  | N/ A       | N/ A     | KX465073 |
| <i>Saccharata</i>          | <i>leucospermi</i>   | CBS 122694   | NR_168142 | EU552129  | EU552094   | KX464073 |          |
| <i>Rupestriomyces</i>      | <i>sinensis</i>      | CGMCC 3.1706 | KF680788  | KF513525  | N/ A       | KJ733740 | KJ733715 |
| <i>Rupestriomyces</i>      | <i>torulosus</i>     | CGMCC 3.1705 | KF680792  | KF513528  | N/ A       |          | KJ733710 |
| <i>Rupestriomyces</i>      | <i>ampulliformis</i> | CGMCC 3.1706 | KF680798  | KF513537  | N/ A       | KJ733739 | KJ733713 |
| <i>Spissiomycetes</i>      | <i>aggregatus</i>    | CGMCC 3.1707 | NG_059959 | KF513518  | N/ A       | KJ733736 | KJ733706 |
| <i>Spissiomycetes</i>      | <i>ramosus</i>       | CGMCC 3.1707 | KF680783  | KF513515  |            | KJ733734 | KJ733700 |
| <i>Helicomyces</i>         | <i>roseus</i>        | CBS 283.51   | DQ678083  | AY916464  | DQ677928   | DQ677981 | N/ A     |
| <i>Tubeufia</i>            | <i>paludosa</i>      | CBS 120503   | GU301877  | N/ A      | GU349024   | GU357754 | N/ A     |
| <i>Tubeufia</i>            | <i>amazonensis</i>   | ATCC 42524   | AY787938  | AY916458  | N/ A       | N/ A     | N/ A     |
| <i>Tubeufia</i>            | <i>cereae</i>        | CBS 254.75   | DQ470982  | N/ A      | DQ471105   | DQ470934 | N/ A     |
| <i>Coniosporium</i>        | <i>uncinatum</i>     | CBS 100219   | NG_058806 | NR_145343 | N/ A       | GU250957 | N/ A     |
| <i>Coniosporium</i>        | <i>apollinis</i>     | CBS 109860   | GU250899  | N/ A      | Mycocosm   | GU250953 | Mycocosm |

|                         |                      |            |           |           |          |          |          |
|-------------------------|----------------------|------------|-----------|-----------|----------|----------|----------|
| <i>Schismatomma</i>     | <i>decolorans</i>    | AFTOL 307  | AY548815  | N/ A      | DQ883725 | DQ883715 | N/ A     |
| <i>Hysteropatella</i>   | <i>clavispora</i>    | CBS 247.34 | AY541483  | N/ A      | DQ677901 | DQ677955 | N/ A     |
| <i>Cryomyces</i>        | <i>minteri</i>       | CCFEE 5187 | NG_058847 | Mycocosm  | Mycocosm | N/ A     | N/ A     |
| <i>Cryomyces</i>        | <i>antarcticus</i>   | CCFEE 534  | Mycocosm  | Mycocosm  | Mycocosm | N/ A     | Mycocosm |
| <i>Cryomyces</i>        | <i>montanus</i>      | CCFEE 5476 | NG_073589 | NR_171791 | N/ A     | N/ A     | N/ A     |
| <i>Cryomyces</i>        | <i>funiculosus</i>   | CCFEE 5554 | N/ A      | NR_171790 | N/ A     | N/ A     | N/ A     |
| <i>Haudseptoria</i>     | <i>typhae</i>        | CPC 38203  | MW883815  | MW883421  | N/ A     | N/ A     | MW890131 |
| <i>Asterodiscus</i>     | <i>tamaricis</i>     | L114       | KU234101  | KU234101  | KU234133 | KU234116 | KU234135 |
| <i>Jahnula</i>          | <i>sangamonensis</i> | A482-1B    | EF175662  | JN942350  | N/ A     | N/ A     | N/ A     |
| <i>Jahnula</i>          | <i>aquatica</i>      | R68-1      | EF175655  | JN942354  | N/ A     | N/ A     | N/ A     |
| <i>Aliquandostipite</i> | <i>khaoyaiensis</i>  | ISAN100    | MT860428  | MT864350  | MT873577 | MT873578 | N/ A     |
