# Supplementary material for: Description and Genome Characterization of Three Novel Fungal Strains Isolated from Mars 2020 Mission-Associated Spacecraft Assembly Facility Surfaces—Recommendations for Two New Genera and One Species
Source: MDPI journal article supplement (doi:10.3390/jof9010031), 2022-12-23
Supplement: s1 [file s1]

**Supplemental Table S4: Genomic annotations related to BGCs**

| Strain                           | Region       | Type             | From    | To      | Most similar known cluster    | Product    | Similarity |
|----------------------------------|--------------|------------------|---------|---------|-------------------------------|------------|------------|
| <i>Pasadenomyces melaninifex</i> | Region 3.1   | NRPS-like        | 349990  | 393358  | --                            | --         | --         |
| <i>Pasadenomyces melaninifex</i> | Region 11.1  | NRPS,T1PKS       | 125481  | 177247  | pyranonigrin E                | Polyketide | 100.00%    |
| <i>Pasadenomyces melaninifex</i> | Region 17.1  | T1PKS            | 89094   | 135684  | melanin                       | Polyketide | 100.00%    |
| <i>Pasadenomyces melaninifex</i> | Region 18.1  | NRPS             | 197626  | 240901  | --                            | --         | --         |
| <i>Pasadenomyces melaninifex</i> | Region 31.1  | NRPS-like        | 135644  | 179477  | --                            | --         | --         |
| <i>Pasadenomyces melaninifex</i> | Region 53.1  | T1PKS            | 1       | 39566   | --                            | --         | --         |
| <i>Pasadenomyces melaninifex</i> | Region 57.1  | NRPS             | 3352    | 49900   | --                            | --         | --         |
| <i>Pasadenomyces melaninifex</i> | Region 58.1  | T1PKS            | 24716   | 89331   | monascorubrin                 | Polyketide | 100.00%    |
| <i>Pasadenomyces melaninifex</i> | Region 87.1  | terpene          | 32507   | 53565   | squalestatin S1               | Terpene    | 40.00%     |
| <i>Pasadenomyces melaninifex</i> | Region 97.1  | terpene          | 1386    | 25685   | --                            | --         | --         |
| <i>Pasadenomyces melaninifex</i> | Region 196.1 | NRPS             | 1       | 26175   | --                            | --         | --         |
| <i>Aaosphaeria pasadenensis</i>  | Region 1.1   | NRPS-like        | 1725559 | 1770580 | --                            | --         | --         |
| <i>Aaosphaeria pasadenensis</i>  | Region 2.1   | NRPS             | 680924  | 724851  | --                            | --         | --         |
| <i>Aaosphaeria pasadenensis</i>  | Region 2.2   | T1PKS            | 973844  | 1020487 | --                            | --         | --         |
| <i>Aaosphaeria pasadenensis</i>  | Region 4.1   | T1PKS            | 615603  | 663168  | --                            | --         | --         |
| <i>Aaosphaeria pasadenensis</i>  | Region 4.2   | terpene          | 1104935 | 1126541 | squalestatin S1               | Terpene    | 40.00%     |
| <i>Aaosphaeria pasadenensis</i>  | Region 5.1   | terpene          | 1       | 17641   | --                            | --         | --         |
| <i>Aaosphaeria pasadenensis</i>  | Region 5.2   | NRPS             | 70293   | 134531  | --                            | --         | --         |
| <i>Aaosphaeria pasadenensis</i>  | Region 6.1   | NRPS             | 1250532 | 1295790 | dimethylcoprogen              | NRP        | 100.00%    |
| <i>Aaosphaeria pasadenensis</i>  | Region 6.2   | terpene          | 1315017 | 1337407 | clavaric acid                 | Terpene    | 100.00%    |
| <i>Aaosphaeria pasadenensis</i>  | Region 8.1   | terpene          | 1200299 | 1221511 | --                            | --         | --         |
| <i>Aaosphaeria pasadenensis</i>  | Region 9.1   | indole           | 1071707 | 1092388 | --                            | --         | --         |
| <i>Aaosphaeria pasadenensis</i>  | Region 11.1  | NRPS             | 221640  | 264697  | --                            | --         | --         |
| <i>Aaosphaeria pasadenensis</i>  | Region 13.1  | NRPS-like        | 686312  | 730178  | --                            | --         | --         |
| <i>Aaosphaeria pasadenensis</i>  | Region 14.1  | T1PKS            | 156012  | 199095  | --                            | --         | --         |
| <i>Aaosphaeria pasadenensis</i>  | Region 14.2  | T1PKS            | 658101  | 699665  | --                            | --         | --         |
| <i>Aaosphaeria pasadenensis</i>  | Region 14.3  | T1PKS            | 749235  | 797425  | --                            | --         | --         |
| <i>Aaosphaeria pasadenensis</i>  | Region 15.1  | T1PKS            | 3476    | 38300   | --                            | --         | --         |
| <i>Aaosphaeria pasadenensis</i>  | Region 15.2  | T1PKS,indole     | 588536  | 639094  | secalonic acids               | Polyketide | 37.00%     |
| <i>Aaosphaeria pasadenensis</i>  | Region 19.1  | T1PKS            | 192751  | 241418  | --                            | --         | --         |
| <i>Aaosphaeria pasadenensis</i>  | Region 24.1  | NRPS             | 109263  | 158391  | --                            | --         | --         |
| <i>Aaosphaeria pasadenensis</i>  | Region 27.1  | NRPS-like        | 262686  | 307100  | --                            | --         | --         |
| <i>Aaosphaeria pasadenensis</i>  | Region 30.1  | T1PKS            | 135821  | 182426  | melanin                       | Polyketide | 100.00%    |
| <i>Aaosphaeria pasadenensis</i>  | Region 31.1  | NRPS-like        | 124917  | 169245  | --                            | --         | --         |
| <i>Aaosphaeria pasadenensis</i>  | Region 33.1  | terpene          | 190431  | 211347  | --                            | --         | --         |
| <i>Aaosphaeria pasadenensis</i>  | Region 35.1  | T1PKS            | 189828  | 232853  | --                            | --         | --         |
| <i>Aaosphaeria pasadenensis</i>  | Region 35.2  | T1PKS            | 314011  | 360756  | --                            | --         | --         |
| <i>Aaosphaeria pasadenensis</i>  | Region 41.1  | NRPS-like        | 77044   | 123777  | --                            | --         | --         |
| <i>Aaosphaeria pasadenensis</i>  | Region 44.1  | NRPS             | 24513   | 80040   | --                            | --         | --         |
| <i>Aaosphaeria pasadenensis</i>  | Region 46.1  | T1PKS            | 129843  | 194763  | chaetoviridin E               | Polyketide | 16.00%     |
| <i>Aaosphaeria pasadenensis</i>  | Region 50.1  | indole,NRPS-like | 140456  | 191535  | --                            | --         | --         |
| <i>Aaosphaeria arxii</i>         | Region 5.1   | NRPS             | 140386  | 186264  | dimethylcoprogen              | NRP        | 100.00%    |
| <i>Aaosphaeria arxii</i>         | Region 5.2   | terpene          | 203205  | 225595  | clavaric acid                 | Terpene    | 100.00%    |
| <i>Aaosphaeria arxii</i>         | Region 8.1   | NRPS             | 52423   | 95570   | --                            | --         | --         |
| <i>Aaosphaeria arxii</i>         | Region 26.1  | terpene          | 136652  | 158621  | squalestatin S1               | Terpene    | 40.00%     |
| <i>Aaosphaeria arxii</i>         | Region 38.1  | T1PKS            | 1       | 60011   | oviridin E / 11-epichaetomugi | Polyketide | 22.00%     |
| <i>Aaosphaeria arxii</i>         | Region 40.1  | NRPS             | 38102   | 88208   | vancomycin                    | NRP        | 8.00%      |
| <i>Aaosphaeria arxii</i>         | Region 45.1  | NRPS             | 291459  | 354667  | --                            | --         | --         |
| <i>Aaosphaeria arxii</i>         | Region 50.1  | T1PKS            | 1       | 24106   | --                            | --         | --         |
| <i>Aaosphaeria arxii</i>         | Region 53.1  | T1PKS,indole     | 101374  | 151980  | secalonic acids               | Polyketide | 37.00%     |
| <i>Aaosphaeria arxii</i>         | Region 54.1  | NRPS-like        | 135055  | 175907  | --                            | --         | --         |
| <i>Aaosphaeria arxii</i>         | Region 60.1  | indole           | 92569   | 113420  | --                            | --         | --         |
| <i>Aaosphaeria arxii</i>         | Region 60.2  | T1PKS            | 1457427 | 1504026 | melanin                       | Polyketide | 100.00%    |
| <i>Aaosphaeria arxii</i>         | Region 63.1  | NRPS             | 14427   | 59881   | --                            | --         | --         |
| <i>Aaosphaeria arxii</i>         | Region 68.1  | NRPS-like        | 206722  | 250588  | --                            | --         | --         |
| <i>Aaosphaeria arxii</i>         | Region 75.1  | T1PKS            | 51593   | 99056   | --                            | --         | --         |
| <i>Aaosphaeria arxii</i>         | Region 77.1  | T1PKS            | 397785  | 439843  | --                            | --         | --         |

|                                    |              |                  |        |        |         |            |         |
|------------------------------------|--------------|------------------|--------|--------|---------|------------|---------|
| <i>Aaosphaeria arxii</i>           | Region 77.2  | T1PKS            | 491234 | 537886 | --      | --         | --      |
| <i>Aaosphaeria arxii</i>           | Region 79.1  | T1PKS            | 402924 | 450562 | --      | --         | --      |
| <i>Aaosphaeria arxii</i>           | Region 83.1  | T1PKS            | 322954 | 370951 | --      | --         | --      |
| <i>Aaosphaeria arxii</i>           | Region 87.1  | T1PKS            | 37166  | 85220  | --      | --         | --      |
| <i>Aaosphaeria arxii</i>           | Region 93.1  | T1PKS            | 56062  | 102432 | --      | --         | --      |
| <i>Aaosphaeria arxii</i>           | Region 94.1  | NRPS             | 31365  | 59040  | --      | --         | --      |
| <i>Aaosphaeria arxii</i>           | Region 100.1 | T1PKS            | 1      | 11992  | --      | --         | --      |
| <i>Aaosphaeria arxii</i>           | Region 109.1 | NRPS-like        | 120410 | 163741 | --      | --         | --      |
| <i>Aaosphaeria arxii</i>           | Region 112.1 | T1PKS            | 1      | 30025  | --      | --         | --      |
| <i>Aaosphaeria arxii</i>           | Region 153.1 | terpene          | 117985 | 138852 | --      | --         | --      |
| <i>Aaosphaeria arxii</i>           | Region 153.2 | indole,NRPS-like | 459684 | 517023 | --      | --         | --      |
| <i>Aaosphaeria arxii</i>           | Region 159.1 | NRPS             | 142490 | 198017 | --      | --         | --      |
| <i>Floridaphiala radiotolerans</i> | Region 4.1   | T1PKS            | 862238 | 908800 | melanin | Polyketide | 100.00% |
| <i>Floridaphiala radiotolerans</i> | Region 6.1   | T1PKS            | 665318 | 715085 | --      | --         | --      |
| <i>Floridaphiala radiotolerans</i> | Region 7.1   | terpene          | 325151 | 346565 | --      | --         | --      |
| <i>Floridaphiala radiotolerans</i> | Region 8.1   | terpene          | 185241 | 206665 | --      | --         | --      |
| <i>Floridaphiala radiotolerans</i> | Region 13.1  | terpene          | 23781  | 48452  | --      | --         | --      |
| <i>Floridaphiala radiotolerans</i> | Region 14.1  | NRPS             | 168805 | 224504 | --      | --         | --      |
| <i>Floridaphiala radiotolerans</i> | Region 15.1  | NRPS-like        | 29789  | 73426  | --      | --         | --      |
| <i>Floridaphiala radiotolerans</i> | Region 19.1  | T1PKS            | 221337 | 269747 | --      | --         | --      |
| <i>Floridaphiala radiotolerans</i> | Region 36.1  | T1PKS            | 1      | 46989  | --      | --         | --      |
| <i>Floridaphiala radiotolerans</i> | Region 36.2  | NRPS-like        | 124957 | 168130 | --      | --         | --      |
| <i>Floridaphiala radiotolerans</i> | Region 44.1  | T1PKS            | 147713 | 182118 | --      | --         | --      |
| <i>Floridaphiala radiotolerans</i> | Region 52.1  | T1PKS            | 33605  | 83421  | --      | --         | --      |
