# Supplementary material for: Description and Genome Characterization of Three Novel Fungal Strains Isolated from Mars 2020 Mission-Associated Spacecraft Assembly Facility Surfaces—Recommendations for Two New Genera and One Species
Source: MDPI journal article supplement (doi:10.3390/jof9010031), 2022-12-23
Supplement: s1 [file s1]

**Supplemental tables S5:** Proteomics data utilized in developing WGS-based phylogenomic tree

| Genus                   | Species                                  | Strain              | Version | JGI ID         | Filename                                              |
|-------------------------|------------------------------------------|---------------------|---------|----------------|-------------------------------------------------------|
| <i>Aaospaeria</i>       | <i>arxii</i>                             | CBS 175.79          | v1.0    | Aaoar1         | Aaoar1_GeneCatalog_proteins_20140429.aa.fasta.gz      |
| <i>Acidomyces</i>       | <i>richmondensis</i>                     | BFW                 |         | Acir1_iso      | Acir1_iso_GeneCatalog_proteins_20111207.aa.fasta.gz   |
| <i>Acrocalymma</i>      | <i>vagum</i>                             | DSE3081             | v1.0    | Acrvag1        | Acrvag1_GeneCatalog_proteins_20210226.aa.fasta        |
| <i>Alternaria</i>       | <i>alternata</i>                         | ATCC 11680          |         | Alalt1         | Alalt1_GeneCatalog_proteins_20190828.aa.fasta         |
| <i>Alternaria</i>       | <i>brassicicola</i>                      | ATCC 96836          |         | Albra1         | Albra1_GeneCatalog_proteins_20190921.aa.fasta         |
| <i>Aliquandostipite</i> | <i>khaoyaiensis</i>                      | CBS 118232          | v1.0    | Alikh1         | Alikh1_GeneCatalog_proteins_20170216.aa.fasta         |
| <i>Alternaria</i>       | <i>arborescens</i>                       | BMP0308             |         | Altar1         | Altar1_GeneCatalog_proteins_20190921.aa.fasta         |
| <i>Alternaria</i>       | <i>capsici</i>                           | BMP0180             |         | Altca1         | Altca1_GeneCatalog_proteins_20190921.aa.fasta         |
| <i>Alternaria</i>       | <i>carthami</i>                          | BMP1963             |         | Altcar1        | Altcar1_GeneCatalog_proteins_20190921.aa.fasta        |
| <i>Alternaria</i>       | <i>crassa</i>                            | BMP0172             |         | Altcr1         | Altcr1_GeneCatalog_proteins_20191005.aa.fasta         |
| <i>Alternaria</i>       | <i>dauci</i>                             | BMP0167             |         | Altda1         | Altda1_GeneCatalog_proteins_20191005.aa.fasta         |
| <i>Alternaria</i>       | <i>fragaria</i>                          | BMP3062             |         | Altfr1         | Altfr1_GeneCatalog_proteins_20191015.aa.fasta         |
| <i>Alternaria</i>       | <i>gaissen</i>                           | BMP2338             |         | Altga1         | Altga1_GeneCatalog_proteins_20191016.aa.fasta         |
| <i>Alternaria</i>       | <i>limoniasperae</i>                     | BMP2335             |         | Altli1         | Altli1_GeneCatalog_proteins_20191016.aa.fasta         |
| <i>Alternaria</i>       | <i>longipes</i>                          | BMP0313             |         | Altlo1         | Altlo1_GeneCatalog_proteins_20191016.aa.fasta         |
| <i>Alternaria</i>       | <i>macrospora</i>                        | BMP1949             |         | Altma1         | Altma1_GeneCatalog_proteins_20191016.aa.fasta         |
| <i>Alternaria</i>       | <i>porri</i>                             | BMP0178             |         | Altpo1         | Altpo1_GeneCatalog_proteins_20191016.aa.fasta         |
| <i>Alternaria</i>       | <i>rosae</i>                             | MPI-PUGE-AT-0040    | v1.0    | Altro1         | Altro1_GeneCatalog_proteins_20180320.aa.fasta         |
| <i>Alternaria</i>       | <i>solani</i>                            | BMP0185             |         | Altso1         | Altso1_GeneCatalog_proteins_20191016.aa.fasta         |
| <i>Alternaria</i>       | <i>sp.</i>                               | UNIPAMPA012         | v1.0    | Altsp012       | Altsp012_1_GeneCatalog_proteins_20201206.aa.fasta     |
| <i>Alternaria</i>       | <i>tangelonis</i>                        | BMP2327             | v1.0    | Altta1         | Altta1_GeneCatalog_proteins_20191030.aa.fasta         |
| <i>Alternaria</i>       | <i>tenuissima</i>                        | BMP0304             |         | Altte1         | Altte1_GeneCatalog_proteins_20191025.aa.fasta         |
| <i>Alternaria</i>       | <i>tomatophila</i>                       | BMP2032             |         | Altto1         | Altto1_GeneCatalog_proteins_20200625.aa.fasta         |
| <i>Alternaria</i>       | <i>mali</i>                              | BMP3063             |         | Amal3063       | Amal3063_GeneCatalog_proteins_20191016.aa.fasta       |
| <i>Amniculicola</i>     | <i>lignicola</i>                         | CBS 123094          | v1.0    | Amnli1         | Amnli1_GeneCatalog_proteins_20140304.aa.fasta         |
| <i>Ampelomyces</i>      | <i>quisqualis</i>                        | HMLAC05119          | v1.0    | Ampqui1        | Ampqui1_GeneCatalog_proteins_20160127.aa.fasta        |
| <i>Aplosporella</i>     | <i>prunicola</i>                         | CBS 121.167         | v1.0    | Aplpr1         | Aplpr1_GeneCatalog_proteins_20121211.aa.fasta         |
| <i>Aquilomyces</i>      | <i>patris</i>                            | DSE4099             | v1.0    | Aqupa1         | Aqupa1_GeneCatalog_proteins_20210226.aa.fasta         |
| <i>Ascochyta</i>        | <i>rabiei</i>                            | ArDII               |         | Ascra1         | Ascra1_GeneCatalog_proteins_20170704.aa.fasta         |
| <i>Aulographum</i>      | <i>hederae</i>                           |                     | v2.0    | Aulhe2         | Aulhe2_GeneCatalog_proteins_20130401.aa.fasta         |
| <i>Aureobasidium</i>    | <i>pullulans</i>                         | NBB7.2.1            | v1.0    | AurpulNBB1     | AurpulNBB1_GeneCatalog_proteins_20190122.aa.fasta     |
| <i>Aureobasidium</i>    | <i>pullulans</i> var. <i>melanogenum</i> | CBS 110374          |         | Aurpu_var_mel1 | Aurpu_var_mel1_GeneCatalog_proteins_20130418.aa.fasta |
| <i>Aureobasidium</i>    | <i>pullulans</i> var. <i>namibiae</i>    | CBS 147.97          |         | Aurpu_var_nam1 | Aurpu_var_nam1_GeneCatalog_proteins_20130418.aa.fasta |
| <i>Aureobasidium</i>    | <i>pullulans</i> var. <i>pullulans</i>   | EXF-150             |         | Aurpu_var_pul1 | Aurpu_var_pul1_GeneCatalog_proteins_20130219.aa.fasta |
| <i>Aureobasidium</i>    | <i>pullulans</i> var. <i>subglaciale</i> | EXF-2481            |         | Aurpu_var_sub1 | Aurpu_var_sub1_GeneCatalog_proteins_20120515.aa.fasta |
| <i>Baudoinia</i>        | <i>compniacensis</i>                     | UAMH 10762 (408982) | v1.0    | Bauco1         | Bauco1_GeneCatalog_proteins_20110511.aa.fasta         |
| <i>Bimuria</i>          | <i>novae-zelandiae</i>                   | CBS 107.79          | v1.0    | Bimnz1         | Bimnz1_GeneCatalog_proteins_20150128.aa.fasta         |
| <i>Boeremia</i>         | <i>exigua</i>                            | MPI-SDFR-AT-0100    | v1.0    | Boeex1         | Boeex1_GeneCatalog_proteins_20171129.aa.fasta         |
| <i>Botryosphaeria</i>   | <i>dothidea</i>                          |                     |         | Botdo1         | Botdo1_1_GeneCatalog_proteins_20150128.aa.fasta       |
| <i>Byssothecium</i>     | <i>circinans</i>                         | CBS 675.92          | v1.0    | Bysci1         | Bysci1_GeneCatalog_proteins_20140627.aa.fasta         |
| <i>Cenococcum</i>       | <i>geophilum</i>                         | 1.58                | v2.0    | Cenge3         | Cenge3_GeneCatalog_proteins_20130403.aa.fasta         |
| <i>Cercospora</i>       | <i>berteroae</i>                         | CBS 538.71          |         | Cerbe1         | Cerbe1_GeneCatalog_proteins_20210311.aa.fasta         |
| <i>Cercospora</i>       | <i>zeae-maydis</i>                       |                     | v1.0    | Cerzm1         | Cerzm1_GeneCatalog_proteins_20111029.aa.fasta         |
| <i>Cochliobolus</i>     | <i>heterostrophus</i>                    | Hm338               | v1.0    | ChetHm338      | ChetHm338_1_GeneCatalog_proteins_20200308.aa.fasta    |
| <i>Cochliobolus</i>     | <i>heterostrophus</i>                    | Hm540               |         | ChetHm540      | ChetHm540_1_GeneCatalog_proteins_20210514.aa.fasta    |
| <i>Clavariopsis</i>     | <i>aquatica</i>                          | WDA-00-1            |         | Claaq1         | Claaq1_GeneCatalog_proteins_20200530.aa.fasta         |
| <i>Clathrospora</i>     | <i>elynae</i>                            | CBS 161.51          | v1.0    | Clael1         | Clael1_GeneCatalog_proteins_20140828.aa.fasta         |
| <i>Cladosporium</i>     | <i>fulvum</i>                            |                     | v1.0    | Clafu1         | Clafu1_GeneCatalog_proteins_20110826.aa.fasta         |
| <i>Cladosporium</i>     | <i>sphaerospermum</i>                    | UM843               |         | Clasph1        | Clasph1_GeneCatalog_proteins_20160727.aa.fasta        |
| <i>Clohesomyces</i>     | <i>aquaticus</i>                         |                     | v1.0    | Cloaq1         | Cloaq1_GeneCatalog_proteins_20160307.aa.fasta         |
| <i>Cochliobolus</i>     | <i>carbonum</i>                          | 26-R-13             | v1.0    | Cocca1         | Cocca1_GeneCatalog_proteins_20120427.aa.fasta         |
| <i>Cochliobolus</i>     | <i>heterostrophus</i>                    | C5                  | v3.0    | CocheC5        | CocheC5_4m_GeneCatalog_proteins_20210518.aa.fasta     |
| <i>Cochliobolus</i>     | <i>lunatus</i>                           | m118                | v2.0    | Coclu2         | Coclu2_GeneCatalog_proteins_20120521.aa.fasta         |
| <i>Cochliobolus</i>     | <i>miyabeanus</i>                        | ATCC 44560          | v1.0    | Cocmi1         | Cocmi1_GeneCatalog_proteins_20120427.aa.fasta         |
| <i>Cochliobolus</i>     | <i>sativus</i>                           | ND90Pr              | v1.0    | Cocsa1         | Cocsa1_GeneCatalog_proteins_20110610.aa.fasta         |
| <i>Cochliobolus</i>     | <i>victoriae</i>                         | FI3                 | v1.0    | Cocvi1         | Cocvi1_GeneCatalog_proteins_20120501.aa.fasta         |
| <i>Coniosporium</i>     | <i>apollinis</i>                         | CBS100218           |         | Conap1         | Conap1_GeneCatalog_proteins_20160826.aa.fasta         |
| <i>Corynespora</i>      | <i>cassicola</i>                         | CCP                 | v1.0    | Corca1         | Corca1_GeneCatalog_proteins_20140615.aa.fasta         |
| <i>Cryomyces</i>        | <i>antarcticus</i>                       | CBS 116301          | v3.0    | Cryan3         | Cryan3_GeneCatalog_proteins_20200914.aa.fasta         |
| <i>Cryomyces</i>        | <i>minteri</i>                           | CCFEE 5187          |         | Crymi1         | Crymi1_GeneCatalog_proteins_20210419.aa.fasta         |
| <i>Cucurbitaria</i>     | <i>berberidis</i>                        | CBS 394.84          | v1.0    | Cucbe1         | Cucbe1_GeneCatalog_proteins_20130102.aa.fasta         |
| <i>Teichospora</i>      | <i>sp.</i>                               | FL1471              | v1.0    | Currey1        | Currey1_GeneCatalog_proteins_20180707.aa.fasta        |
| <i>Darksidea</i>        | <i>alpha</i>                             | DSE7016             | v1.0    | Daral1         | Daral1_GeneCatalog_proteins_20210113.aa.fasta         |
| <i>Darksidea</i>        | <i>beta</i>                              | DSE7011             | v1.0    | Darbet1        | Darbet1_GeneCatalog_proteins_20211018.aa.fasta        |
| <i>Decorospora</i>      | <i>gaudefrovi</i>                        |                     | v1.0    | Decga1         | Decga1_GeneCatalog_proteins_20150425.aa.fasta         |
| <i>Delitschia</i>       | <i>confertaspera</i>                     | ATCC 74209          | v1.0    | Delco1         | Delco1_GeneCatalog_proteins_20140624.aa.fasta         |
| <i>Valsariales</i>      | <i>sp.</i>                               | FL0756              | v1.0    | DelFL0756      | DelFL0756_1_GeneCatalog_proteins_20181025.aa.fasta    |
| <i>Delphinella</i>      | <i>strobiligena</i>                      | CBS 735.71          | v1.0    | Delst1         | Delst1_GeneCatalog_proteins_20160906.aa.fasta         |
| <i>Dendryphon</i>       | <i>nanum</i>                             | MPI-CAGE-CH-0243    | v1.0    | Denna1         | Denna1_GeneCatalog_proteins_20180321.aa.fasta         |
| <i>Didymella</i>        | <i>exigua</i>                            | CBS 183.55          | v1.0    | Didex1         | Didex1_GeneCatalog_proteins_20120924.aa.fasta         |
| <i>Didymella</i>        | <i>zeae-maydis</i>                       | 3018                |         | Didma1         | Didma1_GeneCatalog_proteins_20160126.aa.fasta         |
| <i>Didymocrea</i>       | <i>sadasivani</i>                        | CBS 438.65          | v1.0    | Didsa1         | Didsa1_GeneCatalog_proteins_20170324.aa.fasta         |

|                          |                          |                   |      |                    |                                                         |
|--------------------------|--------------------------|-------------------|------|--------------------|---------------------------------------------------------|
| <i>Diplodia</i>          | <i>seriata</i>           | DS831             |      | Dipse1             | Dipse1_GeneCatalog_proteins_20150930.aa.fasta           |
| <i>Dissoconium</i>       | <i>aciculare</i>         |                   | v1.0 | Disac1             | Disac1_GeneCatalog_proteins_20130805.aa.fasta           |
| <i>Dothideomycetes</i>   | <i>sp.</i>               | P12C66            | v1.0 | DotP12C66          | DotP12C66_GeneCatalog_proteins_20201103.aa.fasta        |
| <i>Dothistroma</i>       | <i>septosporum</i>       | NZE10             | v1.0 | Dotsel             | Dotse1_GeneCatalog_proteins_20100818.aa.fasta           |
| <i>Dothidothia</i>       | <i>symphoricarpi</i>     |                   | v1.0 | Dotsy1             | Dotsy1_GeneCatalog_proteins_20131210.aa.fasta           |
| <i>Elsinoe</i>           | <i>ampelina</i>          | CECT20119         | v1.0 | Elsamp1            | Elsamp1_GeneCatalog_proteins_20151205.aa.fasta          |
| <i>Epicoccum</i>         | <i>nigrum</i>            | cont 1108929      | v1.0 | Epini1             | Epini1_GeneCatalog_proteins_20190403.aa.fasta           |
| <i>Eremomyces</i>        | <i>bilateralis</i>       | CBS 781.70        | v1.0 | Erebi1             | Erebi1_GeneCatalog_proteins_20150104.aa.fasta           |
| <i>Fenestella</i>        | <i>fenestrata</i>        | ATCC 66461        | v1.0 | Fenfe1             | Fenfe1_GeneCatalog_proteins_20180419.aa.fasta           |
| <i>Flavomyces</i>        | <i>fulophazii</i>        | DSE8309           | v1.0 | Flaful1            | Flaful1_GeneCatalog_proteins_20210226.aa.fasta          |
| <i>Friedmanniomyces</i>  | <i>endolithicus</i>      | CCFEE 5311        |      | Frien1             | Frien1_GeneCatalog_proteins_20210426.aa.fasta           |
| <i>Friedmanniomyces</i>  | <i>simplex</i>           | CCFEE 5184        |      | Frisi1             | Frisi1_GeneCatalog_proteins_20210419.aa.fasta           |
| <i>Gloniopsis</i>        | <i>sp.</i>               | FL0384            | v1.0 | Glonio1            | Glonio1_GeneCatalog_proteins_20180712.aa.fasta          |
| <i>Glonium</i>           | <i>stellatum</i>         | CBS 207.34        | v1.0 | Glost2             | Glost2_GeneCatalog_proteins_20140303.aa.fasta           |
| <i>Herpotrichia</i>      | <i>sp.</i>               | AK1299            | v1.0 | Herpot1            | Herpot1_1_GeneCatalog_proteins_20180323.aa.fasta        |
| <i>Hortaea</i>           | <i>acidophila</i>        | CBS 113389        | v1.0 | Horac1             | Horac1_GeneCatalog_proteins_20160326.aa.fasta           |
| <i>Hortaea</i>           | <i>thailandica</i>       | CCFEE 6315        |      | Horth1             | Horth1_GeneCatalog_proteins_20210419.aa.fasta           |
| <i>Hortaea</i>           | <i>werneckii</i>         | EXF-2000M0        | v1.0 | Horwer1            | Horwer1_GeneCatalog_proteins_20160803.aa.fasta          |
| <i>Hysterium</i>         | <i>pulicare</i>          |                   |      | Hyspu1             | Hyspu1_1_GeneCatalog_proteins_20150205.aa.fasta         |
| <i>Jahnula</i>           | <i>aquatica</i>          | CBS 123560        | v1.0 | Jahaq1             | Jahaq1_GeneCatalog_proteins_20181114.aa.fasta           |
| <i>Karstenula</i>        | <i>rhodostoma</i>        | CBS 690.94        | v1.0 | Karrh1             | Karrh1_GeneCatalog_proteins_20140225.aa.fasta           |
| <i>Lentithecium</i>      | <i>fluviale</i>          |                   | v1.0 | Lenfl1             | Lenfl1_GeneCatalog_proteins_20121217.aa.fasta           |
| <i>Leptosphaeria</i>     | <i>microscopica</i>      | UNIPAMPA013       | v1.0 | Lepmi1             | Lepmi1_GeneCatalog_proteins_20210729.aa.fasta           |
| <i>Leptosphaeria</i>     | <i>maculans</i>          |                   |      | Lepmu1             | Lepmu1_GeneCatalog_proteins_20110301.aa.fasta           |
| <i>Lepidopterella</i>    | <i>palustris</i>         |                   | v1.0 | Leppa1             | Leppa1_GeneCatalog_proteins_20130322.aa.fasta           |
| <i>Lindgomycetes</i>     | <i>ingoldianus</i>       | ATCC 200398       | v1.0 | Linin1             | Linin1_GeneCatalog_proteins_20141206.aa.fasta           |
| <i>Lineolata</i>         | <i>rhizophorae</i>       | ATCC 16933        | v1.0 | Linh1              | Linh1_GeneCatalog_proteins_20160326.aa.fasta            |
| <i>Lizonia</i>           | <i>empirigonia</i>       | CBS 542.76        | v1.0 | Lizem1             | Lizem1_GeneCatalog_proteins_20150430.aa.fasta           |
| <i>Mytilinidiaceae</i>   | <i>sp.</i>               | NC0267            | v1.0 | Lophiu1            | Lophiu1_GeneCatalog_proteins_20181114.aa.fasta          |
| <i>Lophiostoma</i>       | <i>macrostomum</i>       |                   | v1.0 | Lopma1             | Lopma1_GeneCatalog_proteins_20130805.aa.fasta           |
| <i>Lophium</i>           | <i>mytilinum</i>         | CBS 269.34        | v1.0 | Lopmy1             | Lopmy1_GeneCatalog_proteins_20140604.aa.fasta           |
| <i>Lophiotrema</i>       | <i>nucula</i>            | CBS 627.86        | v1.0 | Lopnu1             | Lopnu1_GeneCatalog_proteins_20160906.aa.fasta           |
| <i>Macroventuria</i>     | <i>anomochaeta</i>       | CBS 525.71        | v1.0 | Macan1             | Macan1_GeneCatalog_proteins_20140424.aa.fasta           |
| <i>Macrophomina</i>      | <i>phaseolina</i>        | MS6               |      | Macph1             | Macph1_GeneCatalog_proteins_20131211.aa.fasta           |
| <i>Macrophomina</i>      | <i>phaseolina</i>        | MPI-SDFR-AT-0080  | v1.0 | Macpha1            | Macpha1_GeneCatalog_proteins_20180322.aa.fasta          |
| <i>Massarina</i>         | <i>eburnea</i>           | CBS 473.64        | v1.0 | Maseb1             | Maseb1_GeneCatalog_proteins_20141122.aa.fasta           |
| <i>Massariosphaeria</i>  | <i>phaeospora</i>        | CBS 611.86        | v1.0 | Masph1             | Masph1_GeneCatalog_proteins_20160922.aa.fasta           |
| <i>Melanomma</i>         | <i>pulvis-pyrius</i>     |                   | v1.0 | Melpu1             | Melpu1_GeneCatalog_proteins_20130415.aa.fasta           |
| <i>Melanops</i>          | <i>tulasnei</i>          | CBS 116805        | v1.0 | Meltu1             | Meltu1_GeneCatalog_proteins_20180421.aa.fasta           |
| <i>Pseudocercospora</i>  | <i>fijiensis</i>         |                   | v2.0 | Mfijiensis         | Mfijiensis_v2.FrozenGeneCatalog_20100402.proteins.fasta |
| <i>Mycosphaerella</i>    | <i>graminicola</i>       |                   | v2.0 | Mgraminicolav2.Fro | Mgraminicolav2.FrozenGeneCatalog20080910.proteins.fasta |
| <i>Microthyrium</i>      | <i>microscopicum</i>     | CBS 115976        | v1.0 | Micmi1             | Micmi1_GeneCatalog_proteins_20150625.aa.fasta           |
| <i>Microdiplodia</i>     | <i>sp.</i>               | AK1800            | v1.0 | Microd1            | Microd1_GeneCatalog_proteins_20180925.aa.fasta          |
| <i>Mycosphaerella</i>    | <i>eumusae</i>           | CBS 114824        |      | Myceu1             | Myceu1_GeneCatalog_proteins_20130311.aa.fasta           |
| <i>Myriangium</i>        | <i>duriae</i>            | CBS260.36         | v1.0 | Myrdu1             | Myrdu1_GeneCatalog_proteins_20121211.aa.fasta           |
| <i>Myriangiaceae</i>     | <i>sp.</i>               | NC1570            | v1.0 | Myrian1            | Myrian1_GeneCatalog_proteins_20181114.aa.fasta          |
| <i>Mytilinidion</i>      | <i>resinicola</i>        | CBS304.34         | v1.0 | Mytre1             | Mytre1_GeneCatalog_proteins_20150115.aa.fasta           |
| <i>Neofusicoccum</i>     | <i>parvum</i>            | UCRNP2            |      | Neopa1             | Neopa1_GeneCatalog_proteins_20130909.aa.fasta           |
| <i>Ophiobolus</i>        | <i>disseminans</i>       | CBS113818         | v1.0 | Ophdi1             | Ophdi1_GeneCatalog_proteins_20140614.aa.fasta           |
| <i>Paraphoma</i>         | <i>chrysanthemicola</i>  | MPI-GEGE-AT-0034  | v1.0 | Parch1             | Parch1_GeneCatalog_proteins_20171014.aa.fasta           |
| <i>Parafenestella</i>    | <i>ontariensis</i>       | EL-6              | v1.0 | Paront1            | Paront1_GeneCatalog_proteins_20220408.aa.fasta          |
| <i>Paraconiothyrium</i>  | <i>sporulosum</i>        | AP3s5-JAC2a       | v1.0 | Parsp1             | Parsp1_GeneCatalog_proteins_20141011.aa.fasta           |
| <i>Patellaria</i>        | <i>atrata</i>            |                   | v1.0 | Patat1             | Patat1_GeneCatalog_proteins_20130514.aa.fasta           |
| <i>Phyllosticta</i>      | <i>citricarpa</i>        | CBS 102373        | v1.0 | Pcit120373         | Pcit120373_GeneCatalog_proteins_20200613.aa.fasta       |
| <i>Phyllosticta</i>      | <i>citrichinaensis</i>   | CBS 129764        | v1.0 | Pcit129764         | Pcit129764_GeneCatalog_proteins_20200914.aa.fasta       |
| <i>Phyllosticta</i>      | <i>citriasiana</i>       | CBS 120426        | v2.0 | Pcitr2             | Pcitr2_GeneCatalog_proteins_20200618.aa.fasta           |
| <i>Periconia</i>         | <i>macrospinososa</i>    | DSE2036           | v1.0 | Perma1             | Perma1_GeneCatalog_proteins_20141217.aa.fasta           |
| <i>Phaeosphaeriaceae</i> | <i>sp.</i>               | PMI_808           | v1.0 | PhaPMI808          | PhaPMI808_GeneCatalog_proteins_20160324.aa.fasta        |
| <i>Phaeosphaeria</i>     | <i>poagena</i>           | MPI-PUGE-AT-0046c | v1.0 | Phapo1             | Phapo1_GeneCatalog_proteins_20180321.aa.fasta           |
| <i>Phyllosticta</i>      | <i>capitulensis</i>      | CBS 111638        | v2.0 | Phcapit2           | Phcapit2_GeneCatalog_proteins_20200621.aa.fasta         |
| <i>Phyllosticta</i>      | <i>citribraziliensis</i> | CBS 100098        | v1.0 | Phcit1             | Phcit1_GeneCatalog_proteins_20161221.aa.fasta           |
| <i>Phoma</i>             | <i>multirostrata</i>     | 7a                | v1.0 | Phomu1             | Phomu1_GeneCatalog_proteins_20180815.aa.fasta           |
| <i>Phoma</i>             | <i>tracheiphila</i>      | IPT5              | v1.0 | Photr1             | Photr1_GeneCatalog_proteins_20140424.aa.fasta           |
| <i>Phyllosticta</i>      | <i>paracitricarpa</i>    | CBS 141357        | v1.0 | Phy27169           | Phy27169_GeneCatalog_proteins_20170510.aa.fasta         |
| <i>Phyllosticta</i>      | <i>sp.</i>               | CPC27913          | v1.0 | Phycpc1            | Phycpc1_GeneCatalog_proteins_20170406.aa.fasta          |
| <i>Piedraia</i>          | <i>hortae</i>            | CBS 480.64        | v1.1 | Pieho1             | Pieho1_1_GeneCatalog_proteins_20130807.aa.fasta         |
| <i>Pleospora</i>         | <i>avicennia</i>         | ATCC 66911        | v1.0 | Pleav1             | Pleav1_GeneCatalog_proteins_20180620.aa.fasta           |
| <i>Pleosporaceae</i>     | <i>sp.</i>               | PMI_138           | v1.0 | PlePMI138          | PlePMI138_1_GeneCatalog_proteins_20190917.aa.fasta      |
| <i>Pleomassaria</i>      | <i>siparia</i>           |                   | v1.0 | Plesi1             | Plesi1_GeneCatalog_proteins_20130603.aa.fasta           |
| <i>Polychaeton</i>       | <i>citri</i>             |                   | v1.0 | Polci1             | Polci1_GeneCatalog_proteins_20130311.aa.fasta           |
| <i>Polyplosphaeria</i>   | <i>fusca</i>             | CBS 125425        | v1.0 | Polfu1             | Polfu1_GeneCatalog_proteins_20140813.aa.fasta           |
| <i>Pseudofusicoccum</i>  | <i>sp.</i>               | LGFMF1611         | v1.0 | Pse1611            | Pse1611_1_GeneCatalog_proteins_20201211.aa.fasta        |
| <i>Pseudovirgaria</i>    | <i>hyperparasitica</i>   | CBS121739         | v1.0 | Psehy1             | Psehy1_GeneCatalog_proteins_20140829.aa.fasta           |
| <i>Pseudocercospora</i>  | <i>musae</i>             | CBS 116634        |      | Psemus1            | Psemus1_GeneCatalog_proteins_20210311.aa.fasta          |

|                           |                        |                  |      |           |                                                    |
|---------------------------|------------------------|------------------|------|-----------|----------------------------------------------------|
| <i>Pseudocercospora</i>   | <i>ulei</i>            | ERN8             | v1.0 | Pseule1   | Pseule1_GeneCatalog_proteins_20190530.aa.fasta     |
| <i>Pyrenochaeta</i>       | <i>inflorescentiae</i> | CORFU0001        | v1.0 | Pyrinf1   | Pyrinf1_GeneCatalog_proteins_20200511.aa.fasta     |
| <i>Pyrenochaeta</i>       | <i>lycopersici</i>     | MPI-SDFR-AT-0127 | v1.0 | Pyrly1    | Pyrly1_GeneCatalog_proteins_20170623.aa.fasta      |
| <i>Pyrenochaeta</i>       | <i>sp.</i>             | DS3sAY3a         | v1.0 | Pyrsp1    | Pyrsp1_GeneCatalog_proteins_20141006.aa.fasta      |
| <i>Pyrenophora</i>        | <i>teres f. teres</i>  |                  |      | Pyrtt1    | Pyrtt1_GeneCatalog_proteins_20110408.aa.fasta      |
| <i>Rachicladosporium</i>  | <i>sp.</i>             | CCFEE 5018       |      | Rac5018   | Rac5018_1_GeneCatalog_proteins_20210311.aa.fasta   |
| <i>Rachicladosporium</i>  | <i>antarcticum</i>     | CCFEE 5527       |      | Racan1    | Racan1_GeneCatalog_proteins_20210311.aa.fasta      |
| <i>Rhizodiscina</i>       | <i>lignyota</i>        | CBS 133067       | v1.0 | Rhili1    | Rhili1_GeneCatalog_proteins_20150422.aa.fasta      |
| <i>Rhytidhysterion</i>    | <i>rufulum</i>         |                  |      | Rhyru1    | Rhyru1_1_GeneCatalog_proteins_20150204.aa.fasta    |
| <i>Saccharata</i>         | <i>proteae</i>         | CBS 121410       | v1.0 | Sacpr1    | Sacpr1_GeneCatalog_proteins_20140222.aa.fasta      |
| <i>Septoria</i>           | <i>musiva</i>          | SO2202           | v1.0 | Sepmu1    | Sepmu1_GeneCatalog_proteins_20100915.aa.fasta      |
| <i>Septoria</i>           | <i>populicola</i>      |                  | v1.0 | Seppo1    | Seppo1_GeneCatalog_proteins_20110720.aa.fasta      |
| <i>Setomelanomma</i>      | <i>holmii</i>          | CBS 110217       | v1.0 | Setho1    | Setho1_GeneCatalog_proteins_20150424.aa.fasta      |
| <i>Setosphaeria</i>       | <i>turcica</i>         | Ei28A            | v2.0 | Settu3    | Settu3_GeneCatalog_proteins_20170818.aa.fasta      |
| <i>Sporormia</i>          | <i>fimetaria</i>       |                  | v1.0 | Spofi1    | Spofi1_GeneCatalog_proteins_20130818.aa.fasta      |
| <i>Stagonospora</i>       | <i>nodorum</i>         | SN15             | v2.0 | Stano2    | Stano2_GeneCatalog_proteins_20110506.aa.fasta      |
| <i>Stagonospora</i>       | <i>sp.</i>             | SRC1lsM3a        | v1.0 | Stasp1    | Stasp1_GeneCatalog_proteins_20141004.aa.fasta      |
| <i>Stemphylium</i>        | <i>lycopersici</i>     | CIDEFI-216       |      | Stely1    | Stely1_GeneCatalog_proteins_20170711.aa.fasta      |
| <i>Stomiopeltis</i>       | <i>betulae</i>         | CBS 114420       | v1.0 | Stobe1    | Stobe1_GeneCatalog_proteins_20180620.aa.fasta      |
| <i>Teratosphaeriaceae</i> | <i>sp.</i>             | NC1134           | v1.0 | TerNC1134 | TerNC1134_1_GeneCatalog_proteins_20190222.aa.fasta |
| <i>Teratosphaeria</i>     | <i>nubilosa</i>        | CBS 116005       | v1.0 | Ternu1    | Ternu1_GeneCatalog_proteins_20140925.aa.fasta      |
| <i>Tothia</i>             | <i>fuscella</i>        | CBS 130266       | v1.0 | Totfu1    | Totfu1_GeneCatalog_proteins_20140831.aa.fasta      |
| <i>Trematosphaeria</i>    | <i>pertusa</i>         | CBS 122368       | v1.0 | Trepe1    | Trepe1_GeneCatalog_proteins_20140415.aa.fasta      |
| <i>Trichodelitschia</i>   | <i>bisporula</i>       | CBS 262.69       | v1.0 | Tribi1    | Tribi1_GeneCatalog_proteins_20141117.aa.fasta      |
| <i>Viridothelium</i>      | <i>virens</i>          |                  | v1.0 | Tryvi1    | Tryvi1_GeneCatalog_proteins_20130617.aa.fasta      |
| <i>Venturia</i>           | <i>effusa</i>          |                  |      | Veneff1   | Veneff1_GeneCatalog_proteins_20200529.aa.fasta     |
| <i>Venturia</i>           | <i>inaequalis</i>      |                  |      | Venin1    | Venin1_GeneCatalog_proteins_20141010.aa.fasta      |
| <i>Venturia</i>           | <i>pirina</i>          |                  |      | Venpi1    | Venpi1_GeneCatalog_proteins_20150407.aa.fasta      |
| <i>Venturia</i>           | <i>populina</i>        | CBS 256.38       | v1.0 | Venpo1    | Venpo1_GeneCatalog_proteins_20220406.aa.fasta      |
| <i>Venturiales</i>        | <i>sp.</i>             | P10P74           | v1.0 | VenspP74  | VenspP74_1_GeneCatalog_proteins_20201207.aa.fasta  |
| <i>Verruculina</i>        | <i>enalia</i>          | CBS 304.66       | v1.0 | Veren1    | Veren1_GeneCatalog_proteins_20140626.aa.fasta      |
| <i>Verruconis</i>         | <i>gallopava</i>       |                  |      | Verga1    | Verga1_GeneCatalog_proteins_20160827.aa.fasta      |
| <i>Westerdykella</i>      | <i>ornata</i>          | CBS 379.55       | v1.0 | Wesor1    | Wesor1_GeneCatalog_proteins_20140626.aa.fasta      |
| <i>Zasmidium</i>          | <i>cellare</i>         | ATCC 36951       | v1.0 | Zasce1    | Zasce1_GeneCatalog_proteins_20120808.aa.fasta      |
| <i>Zopfia</i>             | <i>rhizophila</i>      |                  | v1.0 | Zoprh1    | Zoprh1_GeneCatalog_proteins_20130606.aa.fasta      |
| <i>Zymoseptoria</i>       | <i>ardabiliae</i>      | STIR04_1.1.1     |      | Zymar1    | Zymar1_GeneCatalog_proteins_20141012.aa.fasta      |
| <i>Zymoseptoria</i>       | <i>brevis</i>          | Zb18110          |      | Zymbr1    | Zymbr1_GeneCatalog_proteins_20170711.aa.fasta      |
| <i>Zymoseptoria</i>       | <i>pseudotritici</i>   | STIR04_2.2.1     |      | Zymps1    | Zymps1_GeneCatalog_proteins_20141012.aa.fasta      |
